# Supplementary material
Source: publisher figshare collection journal article supplement (https://gsajournals.figshare.com/articles/dataset/_/7680020)
Supplement: Supplementary file 1 [file 1]

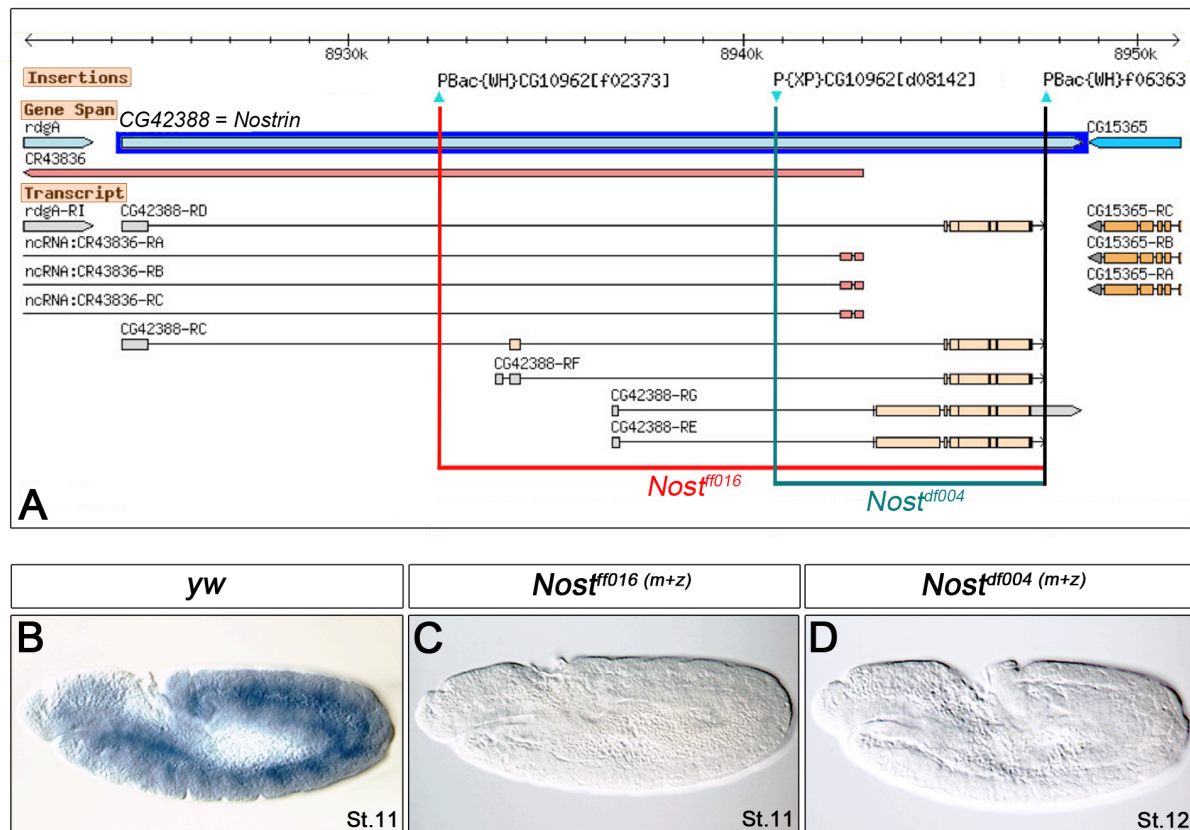

**Figure S2 Excision mutagenesis to generate deletions at the *Drosophila Nost* locus**

**(A)** Genomic map (modified from FlyBase) showing the three pBac insertions used to generate deletions in the *Nost* gene locus via recombination at their FRT sites (red bar: deletion in *Nost<sup>ff016</sup>* allele; green bar: deletion in *Nost<sup>df004</sup>* allele). **(B)** *In situ* hybridization with *Nost* antisense probe for 3' protein coding exons in *yw* control embryo showing mesodermal expression at stage 11. **(C), (D)** *In situ* hybridizations with *Nost* antisense probe as in (B) in embryos homozygous for the two excision alleles confirms lack of *Nost* mRNA expression.
