# Supplementary material
Source: publisher figshare collection journal article supplement (https://gsajournals.figshare.com/articles/dataset/_/7680020)
Supplement: Supplementary file 3 [file 1]

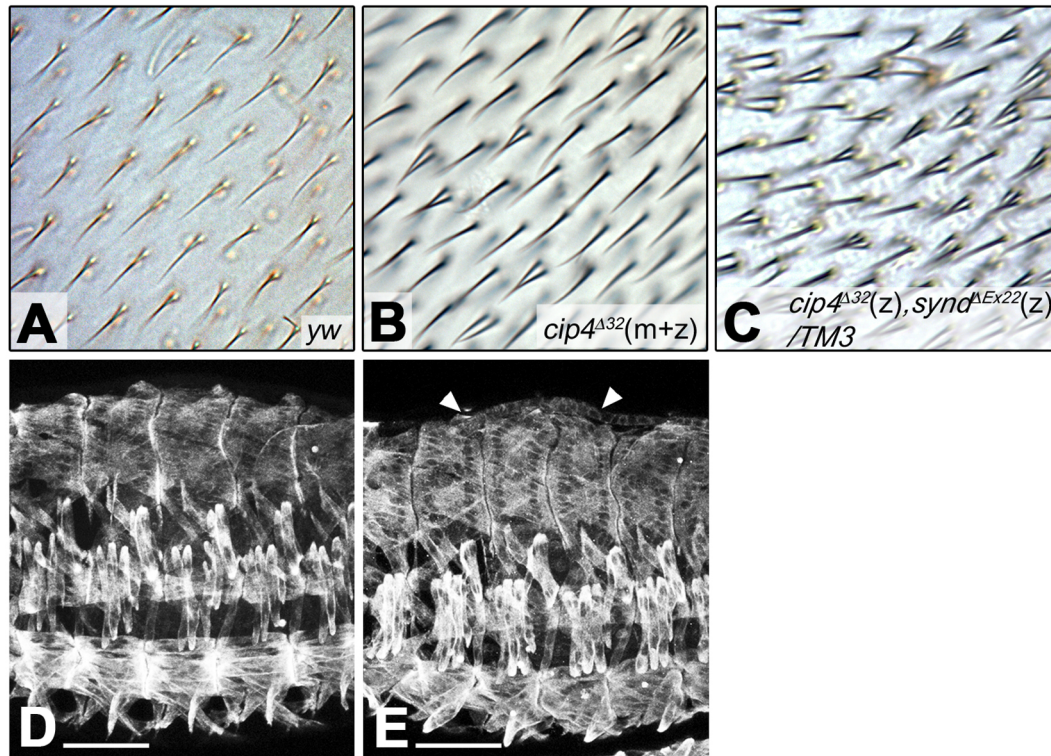

**Figure S3 Genetic interaction of *cip4* with *synd* and phenotypes of *cip4*, *synd* double mutant embryos**

**(A)** Single wing hairs in *yw* control wing. **(B)** Frequently duplicated wing hairs in *cip4*<sup>Δ32(m+z)</sup> mutant wing for comparison to **(C)**, *cip4*<sup>Δ32(z)</sup>, *synd*<sup>ΔEx22(z)</sup>/*TM3*, which shows more frequently duplicated or even triplicated wing hairs in heterozygous condition of *cip synd* double mutant. **(D)** Outside view of musculature of the same stage 16 *yw* control embryo as shown in Fig. 6A (anti-Tropomyosin I). **(E)** Outside view of musculature of the same stage 16 homozygous *cip4*<sup>Δ32(z)</sup>, *synd*<sup>ΔEx22(z)</sup> embryo as shown in Fig. 6B. Muscle phenotypes are not evident. A bulge at the dorsal side of the embryo (arrow heads) is caused by the expansion of the anterior midgut chamber (see Fig. 6B). Scale bars in D, E: 50 μm.
