# Supplementary material
Source: publisher figshare collection journal article supplement (https://gsajournals.figshare.com/articles/dataset/_/7680020)
Supplement: Supplementary file 4 [file 1]

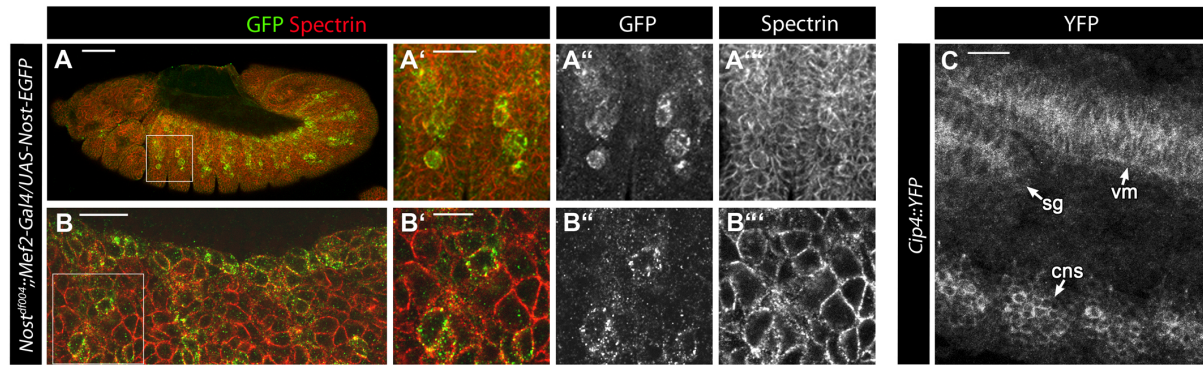

**Figure S1 Localization of Nost-EGFP and Cip4-YFP fusion proteins**

(A - A''') and (B - B''') Homozygous *Nost*<sup>df004</sup> null mutant embryos with *UAS-Nost-EGFP* driven by *Mef2-GAL4* in the somatic mesoderm and stained with anti-GFP and anti-Spectrin antibodies. High magnification views in (A' - A''') and (B' - B''') of boxed areas from (A) and (B), respectively, of somatic mesodermal layers show predominant co-localization of the two proteins within myoblasts, thus indicating localization of Nost-EGFP underneath the plasma membrane. (C) High magnification view of stage 14 embryo from line tagged with YFP at native *Cip4* locus, showing Cip4-YFP localization around the circumference of cells in the visceral mesoderm (vm), central nervous system (CNS), and salivary gland (sg). Scale bars: A, 50µm; A' - A''', B, C, 20 µm; 20µm; B' - B''', 10 µm.
